# Supplementary material for: Impact of SchisandraChinensis Bee Pollen on Nonalcoholic Fatty Liver Disease and Gut Microbiota in HighFat Diet Induced Obese Mice
Source: PubMed Central journal article supplement (PMC6412546; doi:10.3390/nu11020346), 2019-02-06
Supplement: nutrients-11-00346-s001.pdf [file nutrients-11-00346-s001.pdf]

1 Supporting information

2

3

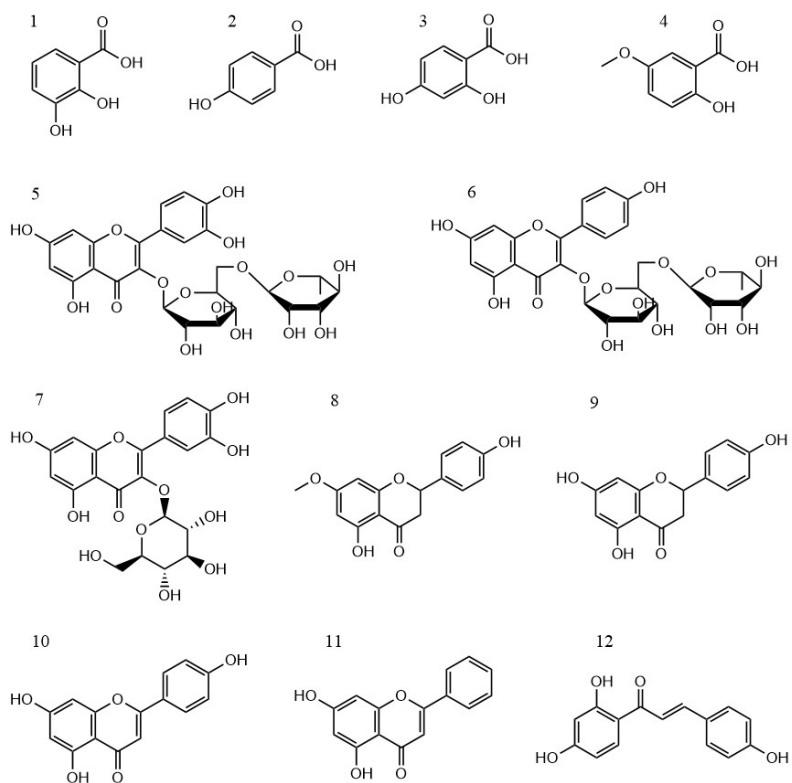

4

5

6 Figure 1. The structure of phenolic compounds identified in SCPE.

7

8  
9  
10  
11  
12  
13  
14  
15  
16  
17  
18  
19  
20  
21  
22  
23  
24  
25  
26  
27  
28  
29  
30  
31  
32  
33  
34  
35  
36  
37  
38

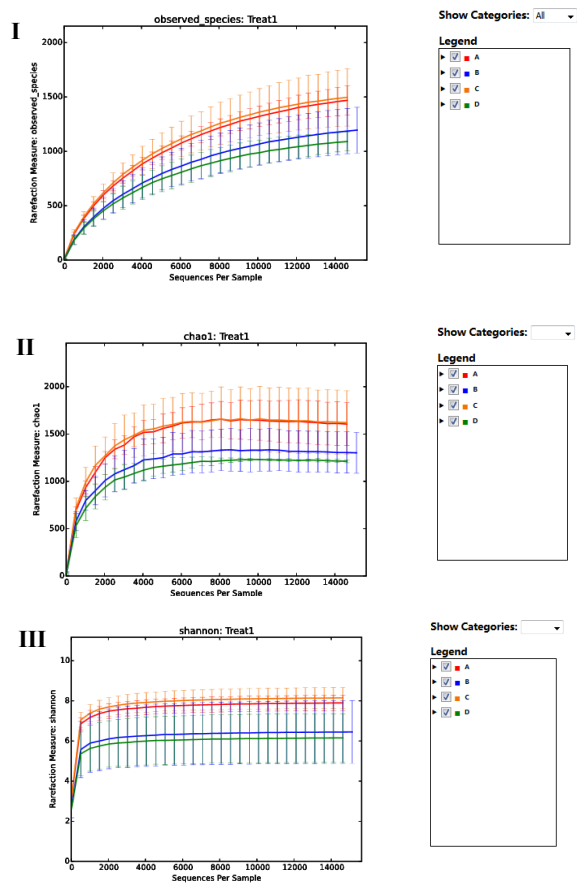

Fig.S2 Alpha diversity analysis of V3-V4 MiSeq sequencing reads of the 16SrRNA gene in different treated mice. I: Rarefaction curve; II: chao1 curve; III: Shannon curve. A: LFD (mice fed with low fat diet); B: HFD mice (mice fed with high fat diet); C: HFD+LE mice (mice fed with high fat diet and 7.86 g/kg BW of SCPE), D: HFD+HE mice (mice fed with high fat diet and 15.72 g/kg BW of SCPE)

39  
40  
41  
42  
43  
44  
45  
46  
47  
48  
49  
50  
51  
52  
53  
54  
55  
56  
57  
58  
59  
60  
61  
62  
63  
64  
65  
66  
67  
68  
69  
70

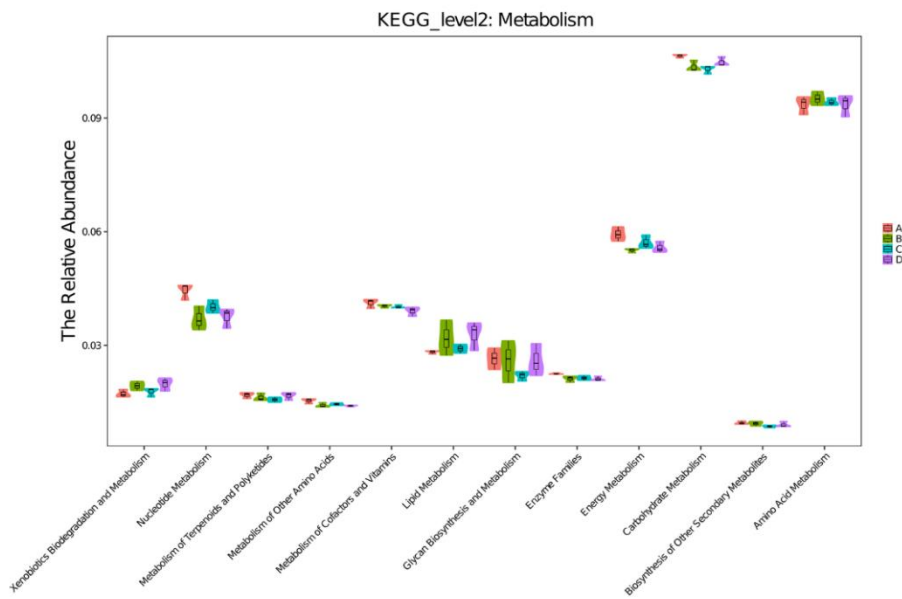

Fig. S3. Functional prediction of gut microbiota. A: LFD (mice fed with low fat diet); B: HFD mice (mice fed with high fat diet); C: HFD+LE mice (mice fed with high fat diet and 7.86 g/kg BW of SCPE), D: HFD+HE mice (mice fed with high fat diet and 15.72 g/kg BW of SCPE)
